# Supplementary material for: Microfluidic single sperm entrapment and analysis
Source: Royal Society of Chemistry journal article supplement (doi:10.1039/c4lc01425a), 2015-01-01
Supplement: c4lc01425a1.pdf [file c4lc01425a1.pdf]

## Supplementary Information

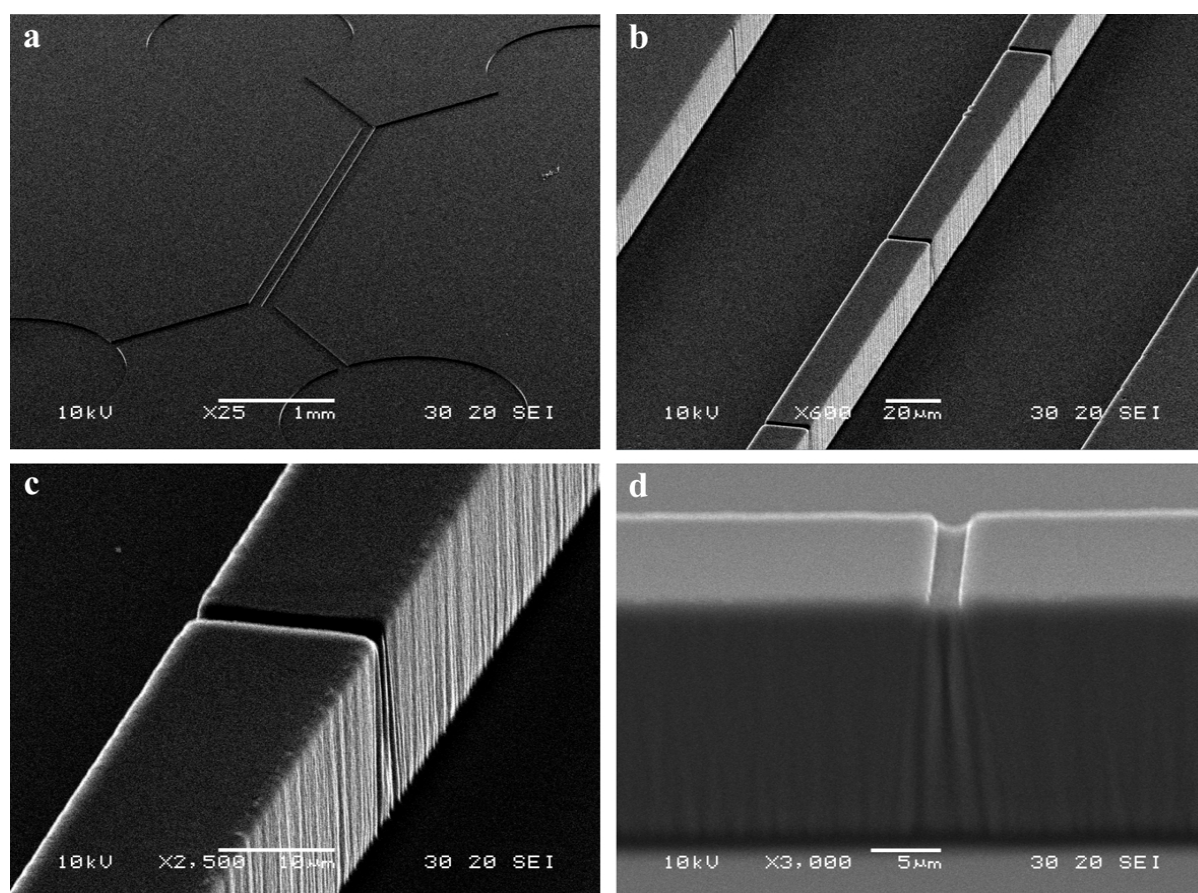

**Figure S1** Scanning electron microscopy images of the PDMS chip using 25x (a), 600x (b), 2,500x (c) and 3,000x (d) magnification. All images were recorded using an acceleration potential of 10 kV.

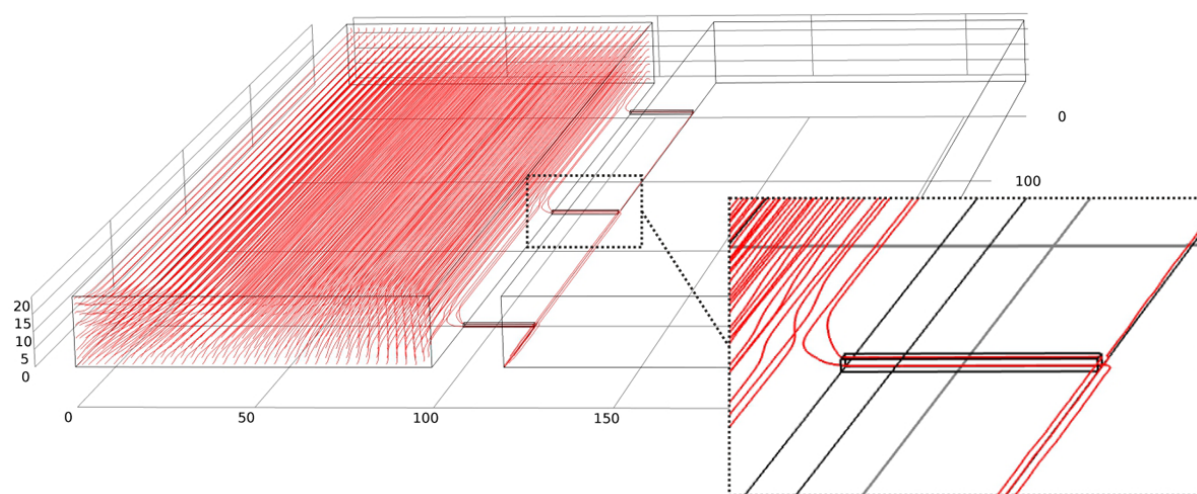

**Figure S2** Fluid streamlines of the pressure difference induced fluid flow from the left to the right main channel.

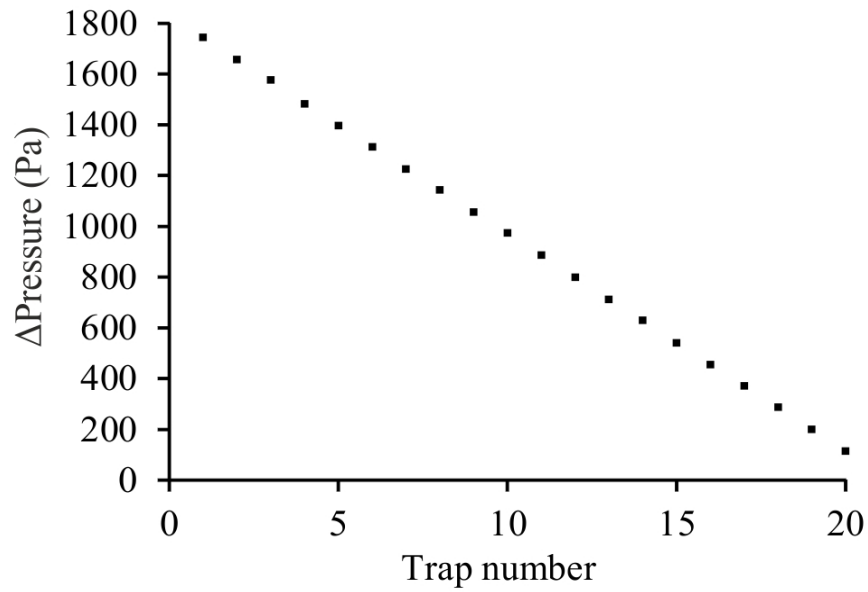

**Figure S3** The pressure difference over a cell trap linearly decreases with increasing trap number. This difference is defined as the difference between the pressure at the side channel inlets (cell trapping regions) and outlets at a z-height of  $0.5\ \mu\text{m}$ .

**Supplementary Movie 1** – Hydrodynamic entrapment of individual spermatozoa due to a pressure difference between top and bottom channel.

**Supplementary Movie 2** – An entrapped spermatozoa is attempting to escape from the trap after decreasing the pressure gradient between top and bottom channel.
